# Supplementary material for: Final outcomes from a phase 2 trial of posoleucel in allogeneic hematopoietic cell transplant recipients
Source: PubMed Central journal article supplement — Blood Adv. 2024 Apr 10;8(17):4740–50. doi: 10.1182/bloodadvances.2023011562 (PMC11413696; doi:10.1182/bloodadvances.2023011562), 2024-04-10
Supplement: BLOODA_ADV-2023-011562-mmc1.pdf [file BLOODA_ADV-2023-011562-mmc1.pdf]

# Supplementary Appendix

**Supplement to:** Dadwal SS, Bansal R, Schuster MW, et al. Posoleucel to Prevent Clinically Significant Viral Infections in High-Risk Patients after Allogeneic Hematopoietic Cell Transplant: Results of an Open-Label Phase 2 Trial

## CONTENTS

|                                                                                                                                                         |    |
|---------------------------------------------------------------------------------------------------------------------------------------------------------|----|
| Posoleucel Manufacturing.....                                                                                                                           | 2  |
| Complete Eligibility Criteria .....                                                                                                                     | 3  |
| Supplemental Table 1. CSIs in in Weeks 1-14 (Primary Endpoint).....                                                                                     | 6  |
| Supplemental Table 2. CSIs in Weeks 15-26.....                                                                                                          | 7  |
| Supplemental Table 3. Cases of Treatment-Emergent Acute GVHD (grade II-IV).....                                                                         | 8  |
| Supplemental Table 4. Cases of Treatment-Emergent Chronic GVHD.....                                                                                     | 8  |
| Supplementary Figure 1. Patient Disposition.....                                                                                                        | 9  |
| Supplementary Figure 2. Detection of Functional Immune Reconstitution and Posoleucel Clones over Time in Patients with CSI During Primary Endpoint..... | 10 |

## **Posoleucel Manufacturing**

Posoleucel is manufactured from peripheral blood mononuclear cells (PBMCs) collected from healthy, third-party donors. These donors have been selected to cover as broadly as possible the HLA diversity of the population at large. Existing posoleucel banks have cell lines matched at a minimum of 2 HLA alleles (matched alleles are defined as shared between the patient, transplant, and posoleucel cell line) estimated to cover 95% of the global population. The HLA alleles used for evaluation of matching were HLA-A, HLA-B, HLA-DRB1, and HLA-DQB1. Each patient received infusions from the same cell line, which was generated from a single donor. PBMCs are cultured with growth-promoting cytokines and viral peptides spanning immunogenic antigens from each of the target viruses: AdV (Hexon and Penton), BKV (VP1 and Large T), CMV (IE1 and pp65), EBV (LMP2, EBNA1, BZLF1) and HHV6 (U90, U11, and U14). After manufacture, posoleucel T cell function is evaluated by IFN $\gamma$  ELISpot assay using ADV, BKV, CMV, EBV, and HHV-6 antigens and posoleucel is cryopreserved for distribution.

## **Complete Eligibility Criteria**

### **Inclusion Criteria**

#### **Age**

- Be  $\geq 1$  year of age at the day of screening.

#### **Type of Participant and Disease Characteristics**

- Has no evidence of AdV, BKV, CMV, EBV, HHV-6, and JCV viremia from a central laboratory at any time prior to treatment assignment OR has evidence of AdV, BKV, CMV, EBV, HHV-6, and/or JCV viremia without symptoms or disease, from a central laboratory at any time prior to treatment assignment

- Be within 15 and 42 (+7) days of receiving a first allogeneic HCT at the time of treatment assignment and have demonstrated engraftment with an absolute neutrophil count  $>500/\mu\text{L}$ .

- High-risk: Patients meeting one or more of the following criteria at the time of treatment assignment:

- o Human leukocyte antigen (HLA)-related (sibling) donor with at least one mismatch at one of the following three HLA-gene loci: HLA-A, -B or -DR

- o Haploidentical donor

- o Unrelated donor with at least one mismatch at one of the following four HLA-gene loci: HLA-A, -B, -C and -DRB1

- o Use of umbilical cord blood as stem cell source

- o Ex vivo graft manipulation resulting in T cell depletion

- o Lymphocyte count  $<180/\text{mm}^3$  and/or cluster of differentiation 4 (CD4) T cell count  $<50/\text{mm}^3$

#### **Sex**

- Male and/or female

a. Male participants:

Male participants are eligible to participate if they agree to the following during the study intervention period and for at least 90 days after the last dose of study intervention:

- Refrain from donating sperm PLUS, either:

- Be abstinent from heterosexual intercourse as their preferred and usual lifestyle (abstinent on a long term and persistent basis) and agree to remain abstinent

OR

- Must agree to use contraception /barrier as detailed below

- Agree to use a male condom and should also be advised of the benefit for a female partner to use a highly effective method of contraception as a condom may break or leak when having sexual intercourse with a woman of childbearing potential (WOCBP) who is not currently pregnant

b. Female participants:

- A female participant is eligible to participate if she is not pregnant or breastfeeding, and 1 of the following conditions applies:

- Is a woman of non-childbearing potential (WONCBP) as defined in Section 10.4.1

OR

- Is a WOCBP and using an acceptable contraceptive method as described in Section 10.4.2 during the study intervention period and for at least 90 days after the last dose of study intervention. The Investigator should evaluate the potential for contraceptive method failure (eg, noncompliance, recently initiated) in relationship to the first dose of study intervention.
- A WOCBP must have a negative highly sensitive serum pregnancy test within 14 days before the first dose of study intervention, see Section 8.4.5.

### **Informed Consent**

-Willing and able to provide written informed consent as described in Section 10.1.3 to participate in the study, or a parent or legal guardian is willing and able to provide written informed consent and the potential pediatric patient is able to provide assent in a manner

### **Exclusion Criteria**

Patients who meet any of the following criteria will be excluded from participation in the study:

#### **Medical Conditions**

1. Has a history of AdV, BKV, CMV, EBV, HHV-6, and/or JCV end-organ disease within 6 months prior to treatment assignment
2. Has evidence of AdV, BKV, CMV, EBV, HHV-6, and/or JCV viremia for more than 3 viruses, from a central or local laboratory at any time during Screening prior to treatment assignment
3. Evidence of active Grade >2 acute GVHD (for additional information on acute GVHD grading and severity, see Appendix 5 [Section 10.5] or CRS Appendix 6 [Section 10.6], respectively).
4. Presence of non-minor uncontrolled or progressive bacterial or fungal infections (ie, evidence of bacteremia, fungemia, disseminated, and/or organ-specific infection not well controlled by present therapies)
5. Presence of progressive, uncontrolled viral infections with evidence of end organ disease
6. Known history or current (suspected) diagnosis requiring treatment of CRS associated with the administration of peptides, proteins, and/or antibodies
7. Evidence of encephalopathy at screening
8. Relapse of primary malignancy other than minimal residual disease.

#### **Prior/Concomitant Therapy**

9. Donor lymphocyte infusion performed within 21 days prior to randomization
10. Received within 7 days prior to treatment assignment any of the following: ganciclovir, valganciclovir, foscarnet, acyclovir (at doses >3200 mg PO per day or >25 mg/kg IV per day), valacyclovir (at doses >3000 mg PO per day), famciclovir (at doses >1500 mg PO per day)
11. Received any investigational antiviral agent/biologic therapy within 30 days prior to screening or plans to receive during the study any of the following: cidofovir, CMV hyper-immune globulin, or any investigational CMV antiviral agent/biologic therapy.
12. Ongoing therapy with high-dose systemic corticosteroids (ie, prednisone equivalent dose >0.5 mg/kg/day) within 7 days prior to screening

13. Prior therapy with antithymocyte globulin, alemtuzumab (Campath-1H), or other immunosuppressive T cell-targeted monoclonal antibodies within 28 days of treatment assignment

14. Receipt of mechanical ventilation of any type, within 1 month prior to the administration of ALVR105 (unless related to airway control)

15. Undergoing dialysis at any time during the screening period

#### **Prior/Concurrent Clinical Study Experience**

16. Received a previous allogeneic HCT (Note: Receipt of a previous autologous HCT is acceptable)

17. Receipt of another investigational antiviral vaccine or treatment during the study or within 28 days prior to treatment assignment or study treatment administration

#### **Diagnostic assessments**

18. Aspartate aminotransferase or alanine aminotransferase serum levels  $>5 \times$  the upper limit of normal (ULN) or direct bilirubin serum levels  $>2 \times$  the ULN reference per central laboratory.

19. Presence of any progressive, uncontrolled viral infections (ie, evidence of viremia, dissemination, and/or organ-specific infection not well controlled by present therapies) not targeted by ALVR105.

#### **Other Exclusions**

20. Pregnant, breastfeeding, or planning to become pregnant during the study

21. Has a history or current evidence of any condition, therapy, lab abnormality, or other circumstance that might confound the results of the study, interfere with the patient's participation for the full duration of the study, or would be put at undue risk as judged by the Investigator, such that it is not in the best interest of the patient to participate in this study.

**Supplementary Table 1. CSIs in in Weeks 1-14 (Primary Endpoint)**

| <b>Patient details</b>                                                                                                                                                                                                                                          | <b>CMV Viral Load</b>      | <b>CSI Start/End Day</b>  | <b>Treatment Start/End Day</b>   | <b>Relevant Conmeds</b>                        |
|-----------------------------------------------------------------------------------------------------------------------------------------------------------------------------------------------------------------------------------------------------------------|----------------------------|---------------------------|----------------------------------|------------------------------------------------|
| Age/sex: 66/M<br>Disease: Diffuse LCL<br>Donor type: PBSC, haplo<br>Matched HLA alleles: 3<br>Conditioning: Myeloablative, TBI<br>GVHD prophylaxis: PTCy<br>Donor/Recipient CMV serostatus: +/-<br>Letermovir at BL: Yes<br>Viremia on Day 1: BKV 367 copies/mL | Week -1: 94.8 copies/mL    |                           |                                  | <b>LTV Day -27 to 16</b>                       |
|                                                                                                                                                                                                                                                                 | Weeks 1 thru 9: <LLOQ      |                           |                                  |                                                |
|                                                                                                                                                                                                                                                                 | Week 10: 571.3 copies/mL   |                           |                                  |                                                |
|                                                                                                                                                                                                                                                                 | Week 11: 8,647.2 copies/mL | <b>CMV CSI Day 79-100</b> | <b>Valganciclovir Day 79-99</b>  |                                                |
|                                                                                                                                                                                                                                                                 | Week 12: 2,863.4 copies/mL |                           |                                  |                                                |
|                                                                                                                                                                                                                                                                 | Week 13: 404.5 copies/mL   |                           |                                  |                                                |
|                                                                                                                                                                                                                                                                 | Week 14: <LLOQ             |                           |                                  |                                                |
|                                                                                                                                                                                                                                                                 | Week 18: 217.2 copies/mL   |                           |                                  |                                                |
|                                                                                                                                                                                                                                                                 | Week 22: 1,686.1 copies/mL |                           | <b>Valganciclovir Day 141-</b>   |                                                |
|                                                                                                                                                                                                                                                                 | Week 26: <LLOQ             |                           |                                  |                                                |
| Age/sex: 57/F<br>Disease: Diffuse CLL<br>Donor type: PBSC, MMUD<br>Matched HLA alleles: 4<br>Conditioning: RIC<br>GVHD prophylaxis: Tacrolimus<br>Donor/Recipient CMV serostatus: +/-<br>Letermovir at BL: Yes<br>Viremia on Day 1: No                          | <b>CMV Viral Load</b>      | <b>CSI Start/End Day</b>  | <b>Treatment Start/End Day</b>   | <b>Relevant Conmeds</b>                        |
|                                                                                                                                                                                                                                                                 | Weeks 1 thru 4: <LLOQ      |                           |                                  | <b>LTV Day -34 to 15</b>                       |
|                                                                                                                                                                                                                                                                 | Week 5: 1,686.1 copies/mL  | <b>CMV CSI Day 37-64</b>  | <b>Valganciclovir Day 37-118</b> |                                                |
|                                                                                                                                                                                                                                                                 | Week 6: 1,686.1 copies/mL  |                           |                                  |                                                |
|                                                                                                                                                                                                                                                                 | Week 7: 1,435.1 copies/mL  |                           |                                  |                                                |
|                                                                                                                                                                                                                                                                 | Week 8: 104.0 copies/mL    |                           |                                  |                                                |
|                                                                                                                                                                                                                                                                 | Week 9 thru ET: <LLOQ      |                           |                                  |                                                |
| Age/sex: 14/F<br>Disease: Diffuse mL<br>Donor type: Bone marrow, haplo<br>Matched HLA alleles: 2<br>Conditioning: Myeloablative<br>GVHD prophylaxis: PTCy<br>Donor/Recipient CMV serostatus: +/-<br>Letermovir at BL: No<br>Viremia on Day 1: No                | <b>EBV viral Load</b>      | <b>CSI Start/End Day</b>  | <b>Treatment Start/End Day</b>   | <b>Relevant Conmeds</b>                        |
|                                                                                                                                                                                                                                                                 | Weeks 1 thru 2: <LLOQ      |                           |                                  |                                                |
|                                                                                                                                                                                                                                                                 | Week 3: 120 copies/mL      |                           |                                  |                                                |
|                                                                                                                                                                                                                                                                 | Week 4: 257 copies/mL      |                           |                                  | <b>Hydrocortisone (1 dose 75 mg IV) Day 28</b> |
|                                                                                                                                                                                                                                                                 | Week 5: 6,764 copies/mL    |                           |                                  |                                                |
|                                                                                                                                                                                                                                                                 | Week 6: 64,595 copies/mL   | <b>EBV CSI Day 37-49</b>  | <b>Rituximab Day 37</b>          | <b>Methylprednisolone (47 mg IV) Day 37</b>    |
|                                                                                                                                                                                                                                                                 | Weeks 7 thru ET: <LLOQ     |                           | <b>Rituximab Day 44</b>          | <b>Methylprednisolone (46 mg IV) Day 44</b>    |

Note: Weeks and Days are in relation to the initiation of posoleucel dosing.

**Supplementary Table 2. CSIs in Weeks 15-26**

| Patient details                                                                                                                                                                                                                                                                     | AdV viral load                                                                                                                                                                                                                                                  | CSI Start/End Day       | Treatment Start/End Day            | Relevant Conmeds           |                                      |                                       |
|-------------------------------------------------------------------------------------------------------------------------------------------------------------------------------------------------------------------------------------------------------------------------------------|-----------------------------------------------------------------------------------------------------------------------------------------------------------------------------------------------------------------------------------------------------------------|-------------------------|------------------------------------|----------------------------|--------------------------------------|---------------------------------------|
| Age/sex: 49/F<br>Disease: Diffuse AML<br>Donor type: PBSC, haplo<br>Matched HLA alleles: 3<br>Conditioning: RIC<br>GVHD prophylaxis: Tacrolimus<br>Donor/Recipient CMV serostatus: +/-<br>Letermovir at BL: Yes*<br>Viremia on Day 1: No<br>*Patient receiving LTV throughout study | Weeks 1 thru 9: <LLOQ                                                                                                                                                                                                                                           |                         |                                    | LTV Day -138 to 88         | Methyl-prednisolone (55 mg IV) Day 8 | Prednisone taper (60-10 mg) Day 20-58 |
|                                                                                                                                                                                                                                                                                     | Week 10: 41 copies/mL                                                                                                                                                                                                                                           |                         |                                    |                            |                                      |                                       |
|                                                                                                                                                                                                                                                                                     | Week 11: 134,896 copies/mL                                                                                                                                                                                                                                      |                         |                                    |                            |                                      |                                       |
|                                                                                                                                                                                                                                                                                     | Week 12: 5,495,409 copy/mL                                                                                                                                                                                                                                      |                         |                                    |                            |                                      |                                       |
|                                                                                                                                                                                                                                                                                     | Week 13: 69,183 copies/mL                                                                                                                                                                                                                                       |                         |                                    |                            |                                      |                                       |
|                                                                                                                                                                                                                                                                                     | Week 14: 100,000 copies/mL                                                                                                                                                                                                                                      | <b>AdV Day 103-129</b>  | <b>Cidofovir Day 103-147</b>       |                            |                                      |                                       |
|                                                                                                                                                                                                                                                                                     | Weeks 18 thru ET: <LLOQ                                                                                                                                                                                                                                         |                         |                                    |                            |                                      |                                       |
|                                                                                                                                                                                                                                                                                     | Age/sex: 31/F<br>Disease: Diffuse ALL<br>Donor type: PBSC, haplo<br>Matched HLA alleles: 4<br>Conditioning: Myeloablative, TBI<br>GVHD prophylaxis: PTCy<br>Donor/Recipient CMV serostatus: +/-<br>Letermovir at BL: Yes<br>Viremia on Day 1: AdV 240 copies/mL | CMV viral load          | CSI Start/End Day                  | Treatment Start/End Day    | Relevant Conmeds                     |                                       |
| Week -2: <LLOQ                                                                                                                                                                                                                                                                      |                                                                                                                                                                                                                                                                 |                         |                                    | Letermovir Day -35 to 9    |                                      |                                       |
| Week -1: 80.7 copies/mL                                                                                                                                                                                                                                                             |                                                                                                                                                                                                                                                                 |                         |                                    |                            |                                      |                                       |
| Day 1: <LLOQ                                                                                                                                                                                                                                                                        |                                                                                                                                                                                                                                                                 |                         |                                    | Valganciclovir Day 9       |                                      |                                       |
| Week 1: 1,016.0 copies/mL                                                                                                                                                                                                                                                           |                                                                                                                                                                                                                                                                 |                         |                                    |                            |                                      |                                       |
| Weeks 2 thru 14: <LLOQ                                                                                                                                                                                                                                                              |                                                                                                                                                                                                                                                                 |                         |                                    |                            | Letermovir Day 29-71                 |                                       |
| Week 18: 702.9 copies/mL                                                                                                                                                                                                                                                            |                                                                                                                                                                                                                                                                 | <b>CMV Day 143-155</b>  | <b>Valganciclovir Day 143-162</b>  |                            | Dasatinib Day 107 (ongoing)          |                                       |
| Week 22: <LLOQ                                                                                                                                                                                                                                                                      |                                                                                                                                                                                                                                                                 |                         |                                    |                            |                                      |                                       |
| Week 26: 249.4 copies/mL                                                                                                                                                                                                                                                            |                                                                                                                                                                                                                                                                 |                         |                                    |                            |                                      |                                       |
| Age/sex: 51/M<br>Disease: Diffuse AML<br>Donor type: PBSC, haplo<br>Matched HLA alleles: 2<br>Conditioning: Myeloablative<br>GVHD prophylaxis: MMF<br>Donor/Recipient CMV serostatus: +/-<br>Letermovir at BL: Yes<br>Viremia on Day 1: No                                          | CMV viral load                                                                                                                                                                                                                                                  | CSI Start/End Day       | Treatment Start/End Day            | Relevant Conmeds           |                                      |                                       |
|                                                                                                                                                                                                                                                                                     | Weeks 1 thru 14: <LLOQ                                                                                                                                                                                                                                          |                         |                                    | Letermovir Day -35 to 127  |                                      |                                       |
|                                                                                                                                                                                                                                                                                     | Week 18 <sup>†</sup> : 545.6 copies/mL                                                                                                                                                                                                                          |                         |                                    |                            |                                      |                                       |
|                                                                                                                                                                                                                                                                                     | Week 19: 7,028.7 copies/mL                                                                                                                                                                                                                                      | <b>CMV Day 132-140*</b> | <b>Valganciclovir Day 132-139</b>  |                            |                                      |                                       |
| Week 22: 1,166.5 copies/mL                                                                                                                                                                                                                                                          |                                                                                                                                                                                                                                                                 |                         |                                    |                            |                                      |                                       |
| Age/sex: 41/F<br>Disease: Diffuse MM<br>Donor type: Bone marrow, MMUD<br>Matched HLA alleles: 2<br>Conditioning: Myeloablative<br>GVHD prophylaxis: Tacrolimus<br>Donor/Recipient CMV serostatus: +/-<br>Letermovir at BL: Yes<br>Viremia on Day 1: No                              | CMV viral load                                                                                                                                                                                                                                                  | CSI Start/End Day       | Treatment Start/End Day            | Relevant Conmeds           |                                      |                                       |
|                                                                                                                                                                                                                                                                                     | Weeks 1 thru 12: <LLOQ                                                                                                                                                                                                                                          |                         |                                    | Letermovir Day -25 to 6    |                                      |                                       |
|                                                                                                                                                                                                                                                                                     | Week 14: 13,392.9 copies/mL                                                                                                                                                                                                                                     | <b>CMV Day 100-108*</b> | <b>Ganciclovir Day 100-ongoing</b> | Ixazomib citrate Day 63-70 |                                      |                                       |
|                                                                                                                                                                                                                                                                                     | Week 15: 232.7 copies/mL                                                                                                                                                                                                                                        |                         |                                    |                            |                                      |                                       |

Note: Weeks and Days are in relation to the initiation of posoleucel dosing.

\*Not possible to assess end since no further viral loads

<sup>†</sup>No viral load data from Day 96 to 124.

**Supplementary Table 3. Cases of Treatment-Emergent Acute GVHD (grade II-IV)**

| GVHD type         | Age/Sex/Disease | #PSL match, Txp Type | Source, Conditioning    | Organ Class | Magic (max) | Outcome            | Relatedness                |
|-------------------|-----------------|----------------------|-------------------------|-------------|-------------|--------------------|----------------------------|
| <b>Acute GVHD</b> | 61/F MDS        | 4/8 MMUD             | PBSC, Reduced Intensity | GI          | II          | Recovered/resolved | Not related                |
|                   | 60/F ALL        | 3/8 Haplo            | PBSC, Myeloablative     | Skin        | II          | Recovered/resolved | Possibly                   |
|                   | 44/M Adreno*    | 3/8 Cord + ATG       | Cord, Myeloablative     | Skin<br>GI  | III         | Recovered/resolved | Not related<br>Not related |
|                   | 69/M AML        | 3/8 MUD              | PBSC, Reduced Intensity | Skin<br>GI  | IV          | Recovered/resolved | Not related<br>Not related |
|                   | 76/M AML        | 3/8 MMUD             | PBSC, Reduced Intensity | GI          | II          | Recovered/resolved | Not related                |

**Supplementary Table 4. Cases of Treatment-Emergent Chronic GVHD**

| GVHD type           | Age/Sex/Disease | #PSL match, Txp Type | Source, Conditioning           | Organ Class | Magic (max) | Outcome                    | Relatedness |
|---------------------|-----------------|----------------------|--------------------------------|-------------|-------------|----------------------------|-------------|
| <b>Chronic GVHD</b> | 59/F AML        | 2/8 Haplo            | Bone marrow, reduced intensity | Lung        | Severe      | Recovered/resolved         | Related     |
|                     | 73/F CML        | 3/8 Haplo            | PBSC; reduced intensity        | Skin        | Severe      | Not recovered/not resolved | Not related |
|                     | 44/M Adreno     | 3/8 Cord             | Cord, Myeloablative            | GI          | --          | Recovered/resolved         | Not related |
|                     | 14/F AML        | 2/8 Haplo            | Bone marrow, myeloablative     | Liver       | Severe      | Not recovered/not resolved | Not related |
|                     | 76/M AML        | 2/8 MMUD             | PBSC, reduced intensity        | Oral        | --          | Recovered/resolved         | Related     |

\*Adrenoleukodystrophy



## Supplementary Figure 1. Patient Disposition

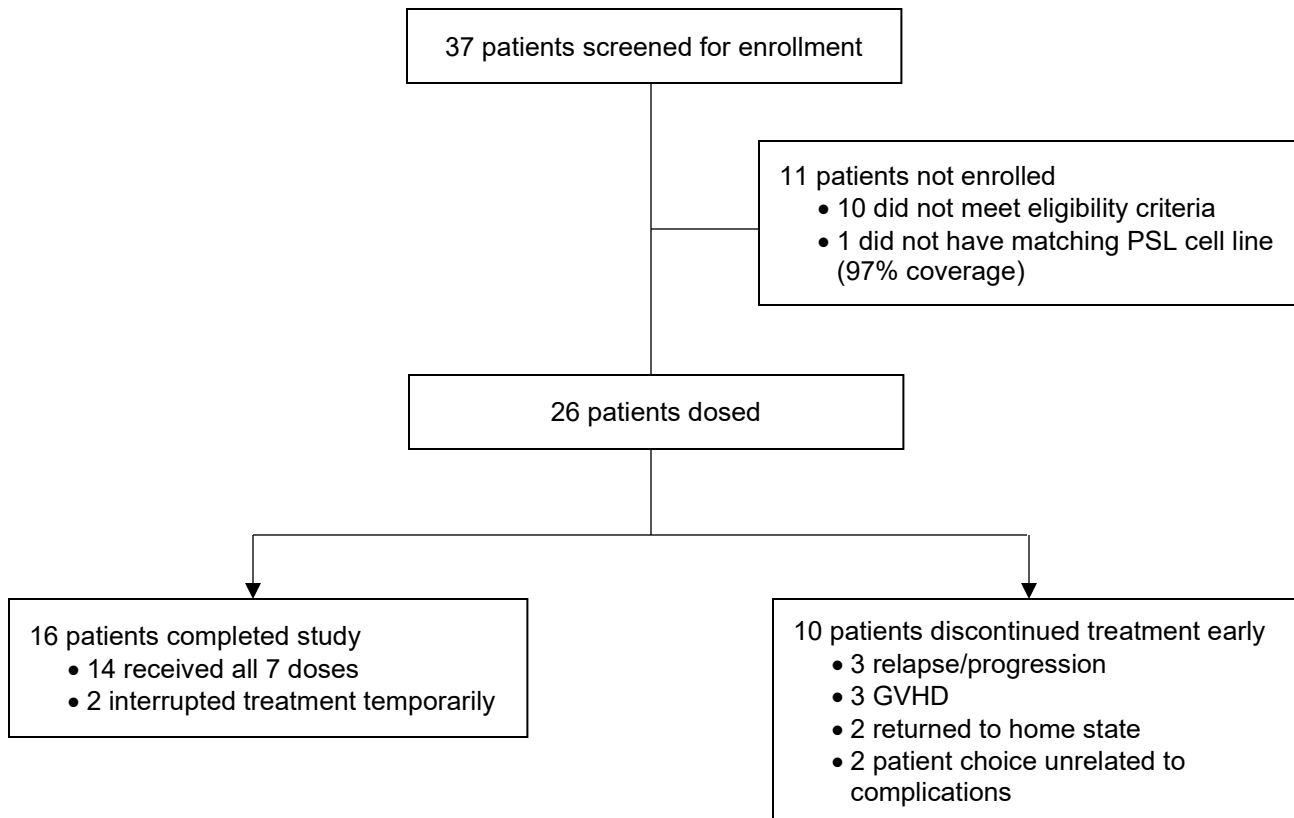

## Supplementary Figure 2. Detection of Functional Immune Reconstitution and Posoleucel Clones Over Time in Patients with CSI During Primary Endpoint

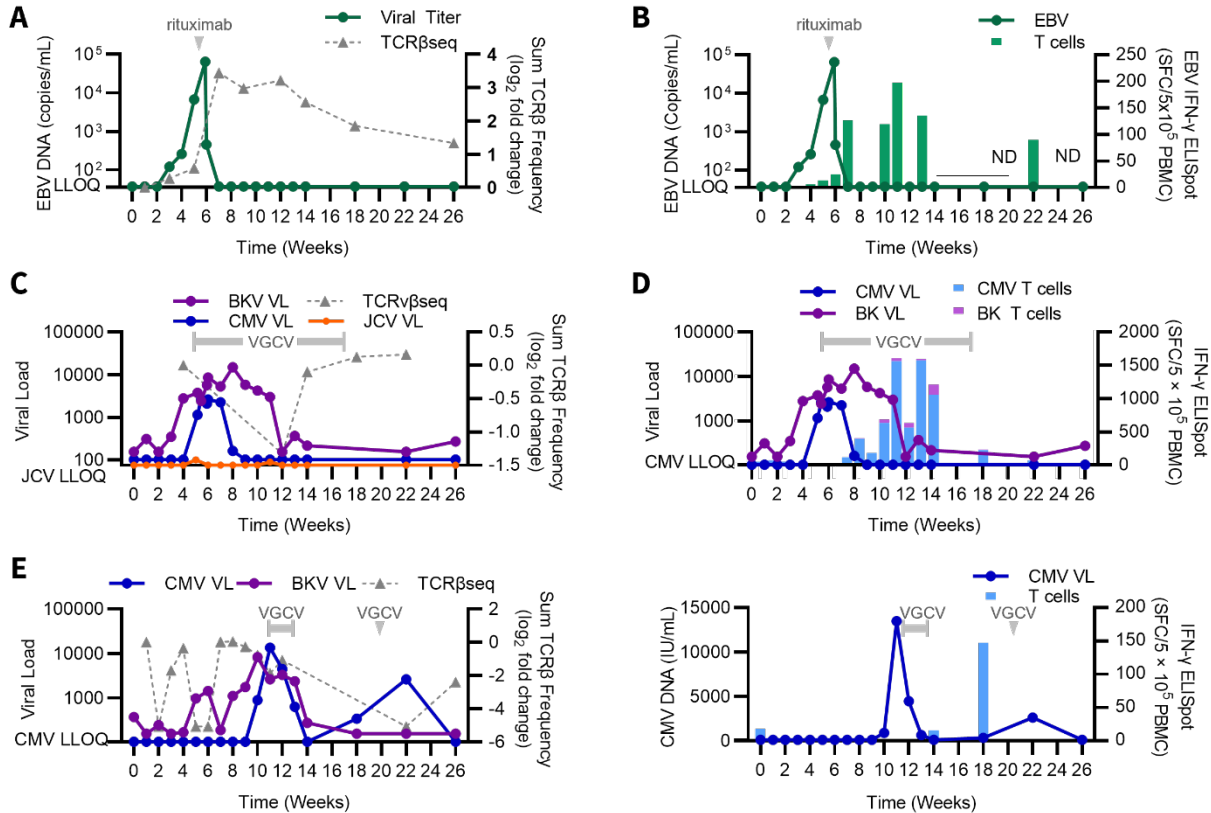

Patient examples of viral load plotted with unique posoleucel clones detected by TCR $\beta$  sequencing (left panels) and functional IFN $\gamma$ <sup>+</sup> virus-specific T cell responses detected by ELISpot (posoleucel and endogenous derived; right panels) through Week 26 of the study. Three patients with CSIs during the primary endpoint period (Week 14) are shown: patient #1: EBV CSI (A, B; received 5 doses of posoleucel, missed doses at Week 6 and 8); patient #2: CMV CSI and BK, JCV viremia (C, D; received all 7 doses of posoleucel), and patient #3: CMV CSI and BKV viremia (E, F; received all 7 doses of posoleucel). TCR $\beta$  clones unique to posoleucel are shown as the log<sub>2</sub> fold change of the sum frequency of clones relative to first timepoint detected. Virus-specific IFN $\gamma$ <sup>+</sup>-producing cells were measured by ELISpot after stimulation of patient PBMCs with AdV, BKV, CMV, EBV, or HHV-6 antigens (SFC per 5 x 10<sup>5</sup> PBMCs). In right panels showing ELISpot data, only viremia for which there was corresponding ELISpot data is shown. All detectable viremia (viremia > LLOQ) is shown in the left panels with TCR $\beta$  sequencing data.
